# Supplementary material for: Control of pH by acetic acid and its effect on ethanol fermentation in an integrated ethanol–methane fermentation process
Source: Royal Society of Chemistry journal article supplement (doi:10.1039/c6ra04129a), 2016-01-01
Supplement: c6ra04129a1.pdf [file c6ra04129a1.pdf]

## Control of pH by acetic acid and its effect on ethanol fermentation in an integrated ethanol-methane fermentation process

Xinchao Yang<sup>1,2</sup>, Ke Wang<sup>1</sup>, Huijun Wang<sup>1</sup>, Jianhua Zhang<sup>1</sup>, Lei Tang<sup>1</sup>, Zhonggui Mao<sup>1,\*</sup>

1. Key Laboratory of Industrial Biotechnology, Ministry of Education, School of Biotechnology, Jiangnan University, Wuxi 214122, China
2. School of Biological Science and Technology, University of Jinan, Jinan 250022, China

### Supplementary information.

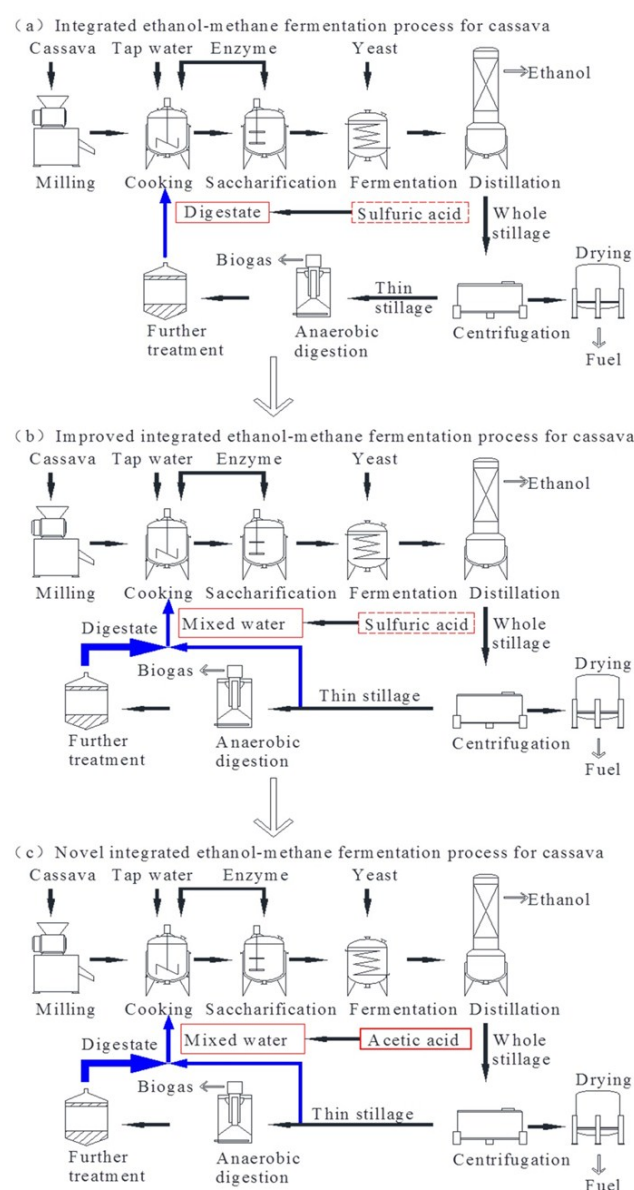

Supplementary fig. 1: Process diagram of the integrated process (a), improved integrated process (b) and novel integrated process (c) for cassava ethanol production.
